# Supplementary material
Source: MDPI journal article supplement (https://www.mdpi.com/2079-6412/11/10/1259)
Supplement: s1 [file s1]

# Supplementary Materials: Melioration of Electrical and Optical Properties of Al and B Co-Doped ZnO Transparent Semiconductor Thin Films

Chien-Yie Tsay \* and Shih-Hsun Yu

Department of Materials Science and Engineering, Feng Chia University, Taichung 40724, Taiwan; s4901551@gmail.com

\* Correspondence: cytsay@mail.fcu.edu.tw; Tel.: +886-4-2451-7250 (ext. 5312)

**Citation:** Tsay, C.-Y.; Yu, S.-H. Melioration of Electrical and Optical Properties of Al and B Co-doped ZnO Transparent Semiconductor Thin Films. *Coatings* **2021**, *11*, 1259. <https://doi.org/10.3390/coatings11101259>

Academic Editor: Alexandru Enesca

Received: 19 September 2021

Accepted: 12 October 2021

Published: 16 October 2021

**Publisher's Note:** MDPI stays neutral with regard to jurisdictional claims in published maps and institutional affiliations.

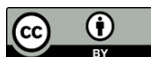

Copyright: © 2021 by the authors. Licensee MDPI, Basel, Switzerland. This article is an open access article distributed under the terms and conditions of the Creative Commons Attribution (CC BY) license (<https://creativecommons.org/licenses/by/4.0/>).

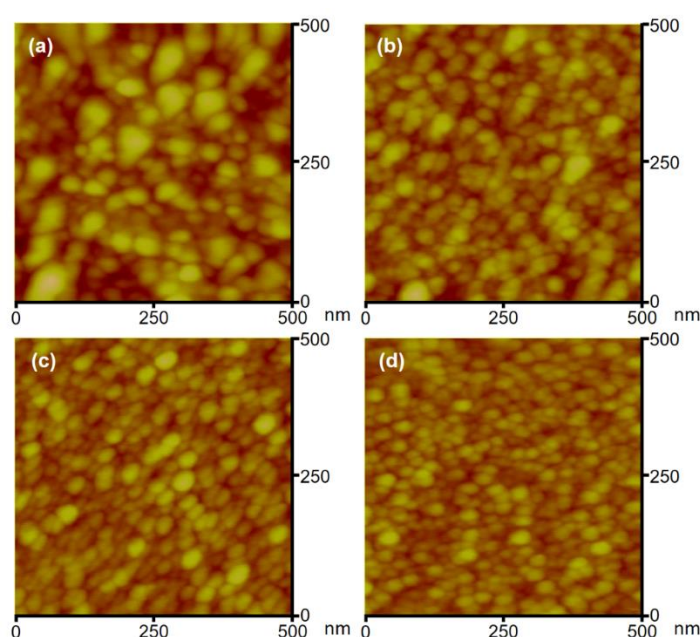

**Figure S1.** 2-D topographical SPM images of ZnO-based thin films: (a) ZnO, (b) ZnO:Al, (c) ZnO:Al-1% B, and (d) ZnO:Al-2% B samples.

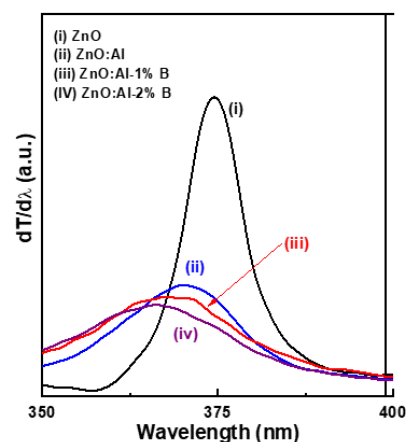

**Figure S2.** Plot of the first derivative of optical transmittance with respect to wavelength ( $dT/d\lambda$ ) versus wavelength in the near-UV region for the ZnO-based thin film samples.
